# Supplementary material for: Molecular insights into capacitive deionization mechanisms inside hydrophobic and hydrophilic carbon nanotube channel electrodes
Source: Royal Society of Chemistry journal article supplement (doi:10.1039/d2ta06006j), 2022-01-01
Supplement: d2ta06006j1.pdf [file d2ta06006j1.pdf]

## Supporting information

### **Molecular insights on capacitive deionization mechanisms inside the hydrophobic and hydrophilic carbon nanotube channel electrodes**

Farzin Saffarimiandoab <sup>a, b</sup>, Roozbeh Sabetvand <sup>c</sup>, Xihui Zhang <sup>\*a, b</sup>

<sup>a</sup> Tsinghua-Berkeley Shenzhen Institute, Tsinghua University, Shenzhen, 518055, China.

<sup>b</sup> Tsinghua Shenzhen International Graduate School, Tsinghua University, Shenzhen, 518055, China.

<sup>c</sup> Department of Energy Engineering and Physics, Faculty of Condensed Matter Physics, Amirkabir University of Technology, Tehran, Iran.

**Table S1.** The Lennard-Jones force field parameters.

| Atom type         | $\sigma$ (Å) | $\epsilon$ (kcal.mol <sup>-1</sup> ) | $q$ (e) |
|-------------------|--------------|--------------------------------------|---------|
| O/SPCE            | 3.166        | 0.1554                               | -0.8476 |
| H/SPCE            | -            | -                                    | 0.4238  |
| Na <sup>+</sup>   | 2.350        | 0.1300                               | +1      |
| Cl <sup>-</sup>   | 4.400        | 0.1000                               | -1      |
| C/CNT hydrophilic | 3.40         | 0.086                                | -       |
| C/CNT hydrophobic | 3.40         | 0.0557                               | -       |
| C/separating wall | 3.40         | 0.0557                               | -       |

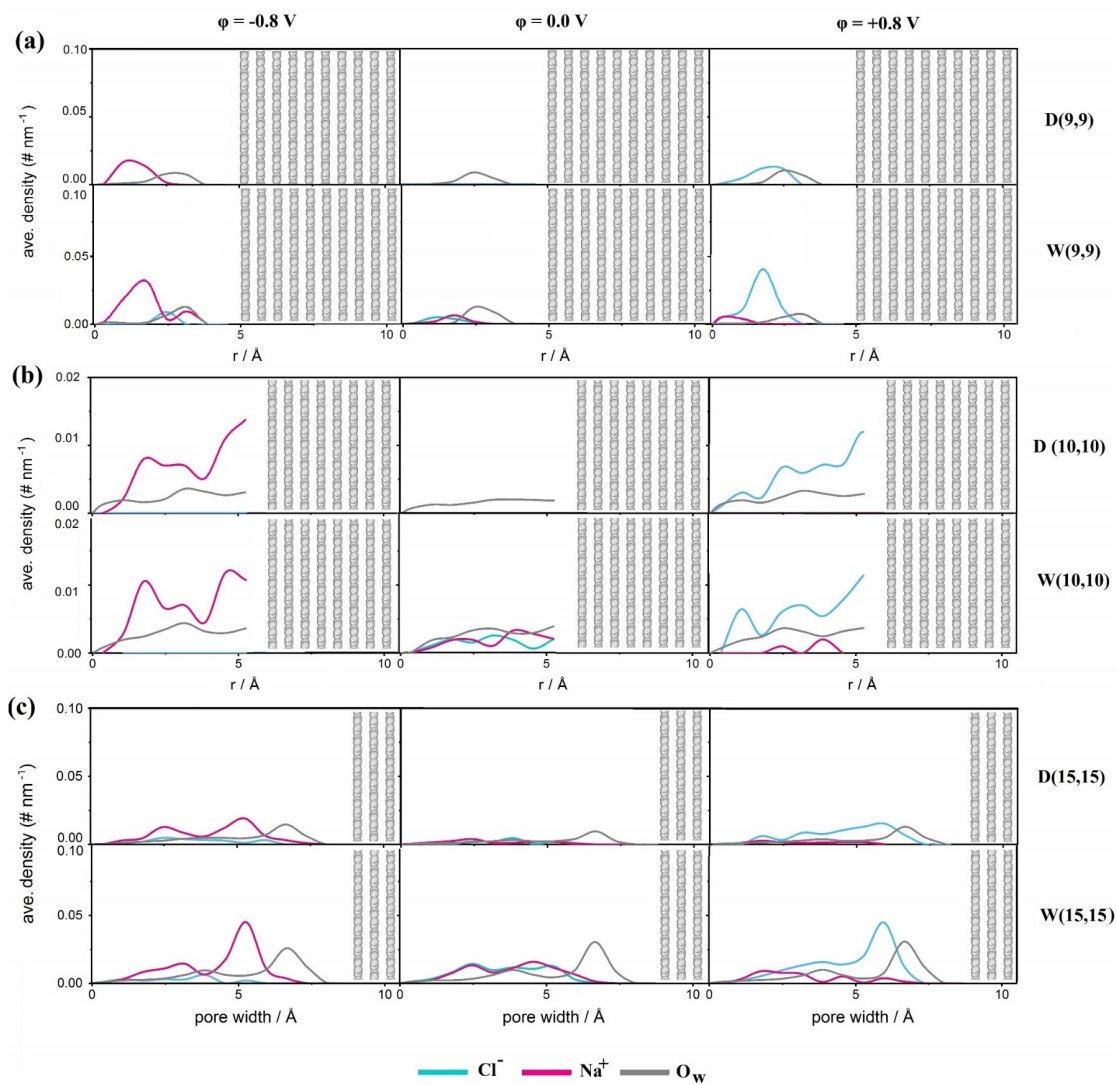

**Fig. S1** The number density distribution inside the uncharged and charged electrodes (a) (9,9) (b) (10,10) (c) (15,15). The number density for oxygen was divided by 50.

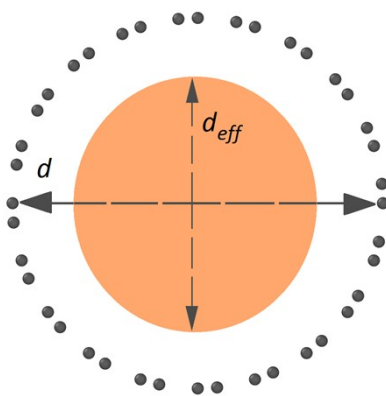

**Fig. S2** The comparison of the effective diameter ( $d_{eff}$ ) and the geometric diameter ( $d$ ) of a CNT.

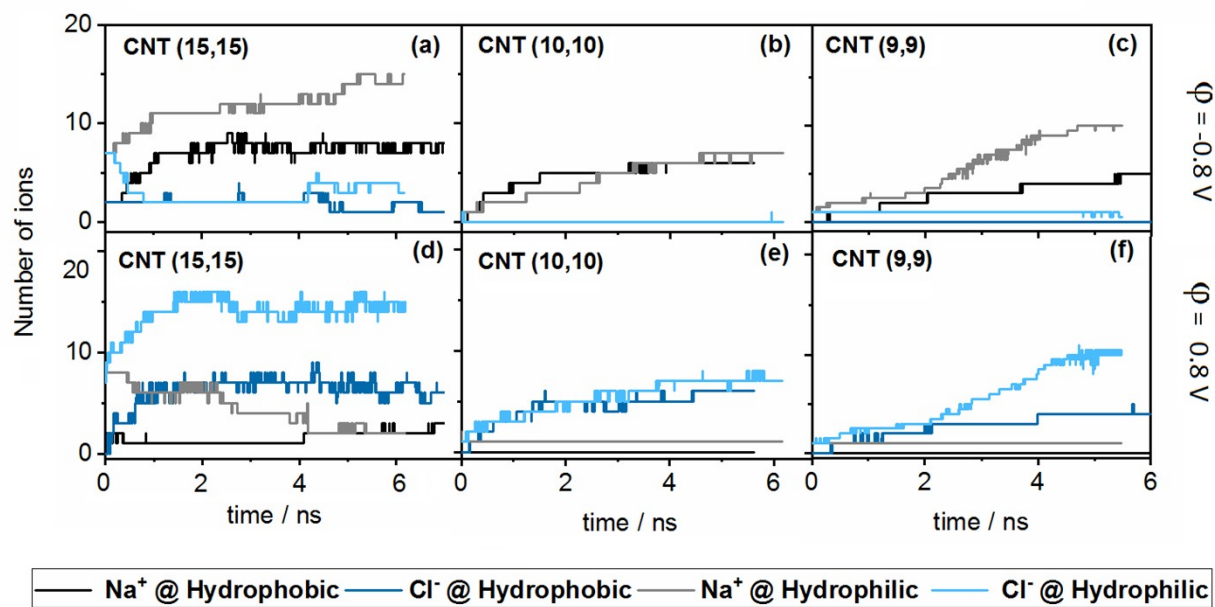

**Fig. S3** The ion electrosorption/repulsion dynamic over the charging time (a) cathode CNT (15,15) (b) cathode CNT (10,10) (c) cathode CNT (9,9) (d) anode CNT (15,15) (e) anode CNT (10,10) (f) anode CNT (9,9).

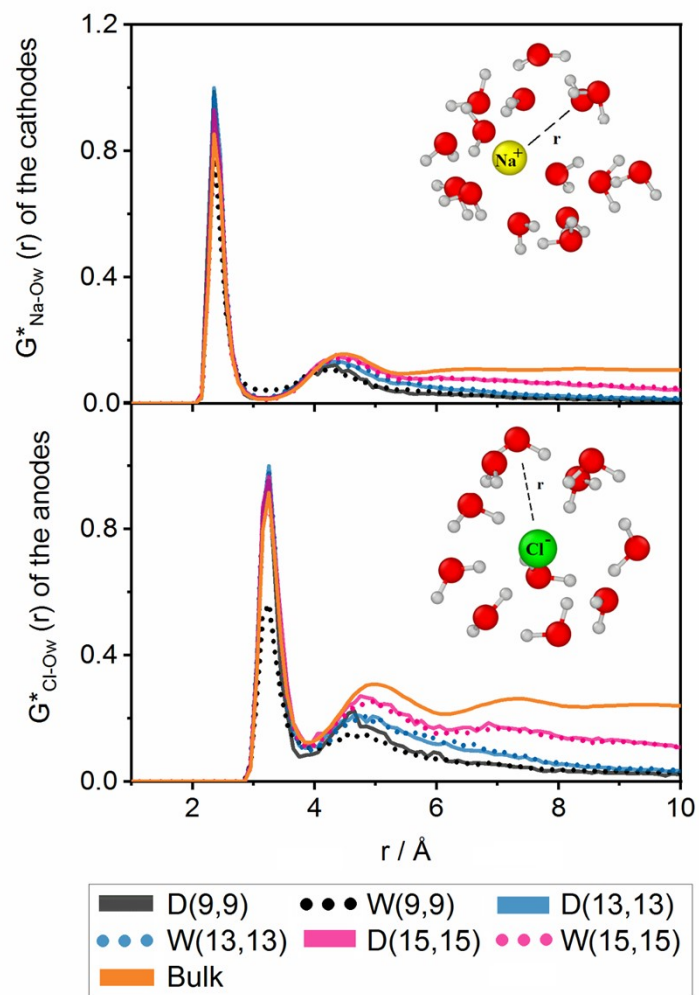

**Fig. S4** The relative bulk and confined ionic species' solvation shell.

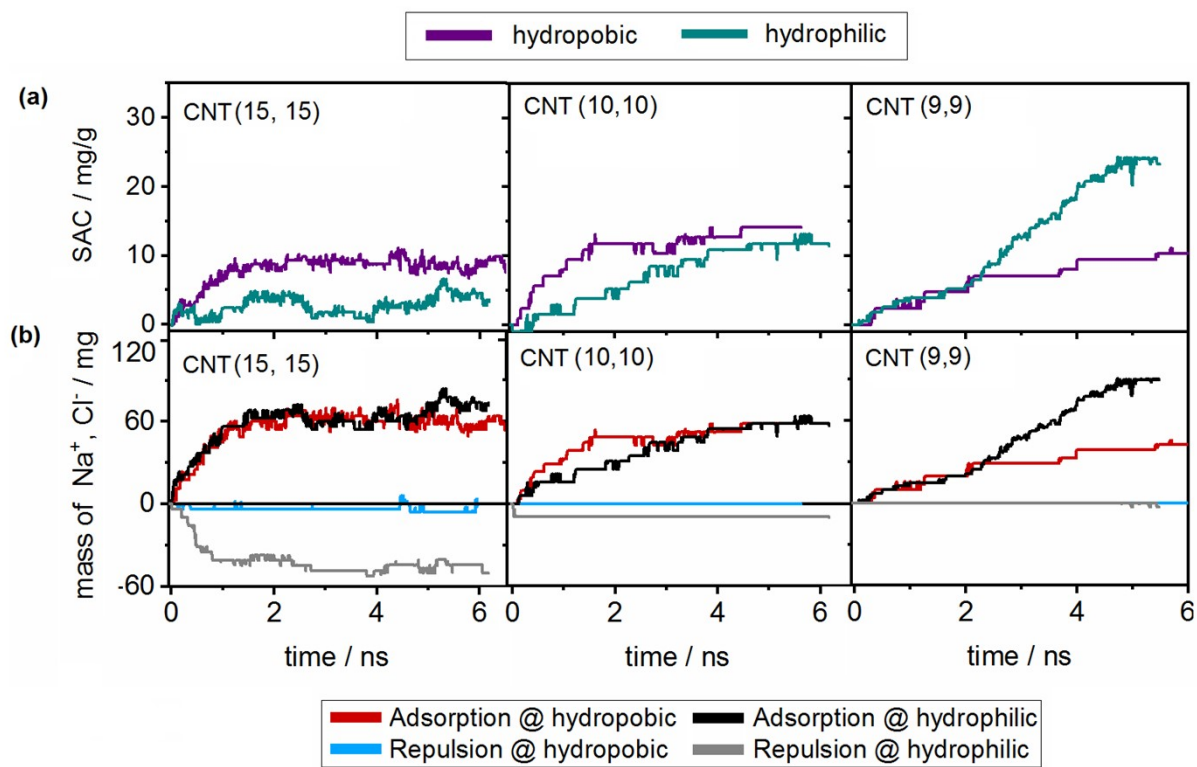

**Fig. S5** (a) SAC of the CDI systems over the charging time (b) temporal mass of the in-pore ions over the charging time.

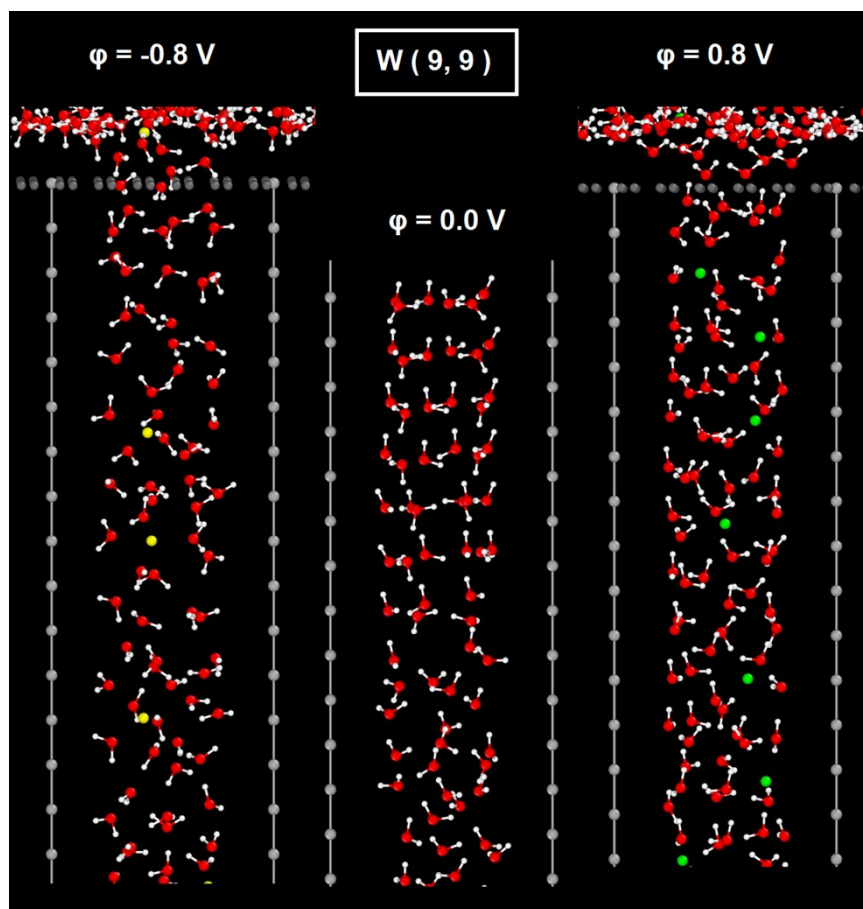

**Fig. S6** The schematic showing the structure of the confined electrolyte inside the charged and uncharged W (9,9) electrodes. The white, red, yellow, green, and grey spheres represent H for water, O for water,  $\text{Na}^+$ ,  $\text{Cl}^-$ , and carbon for the electrode respectively.



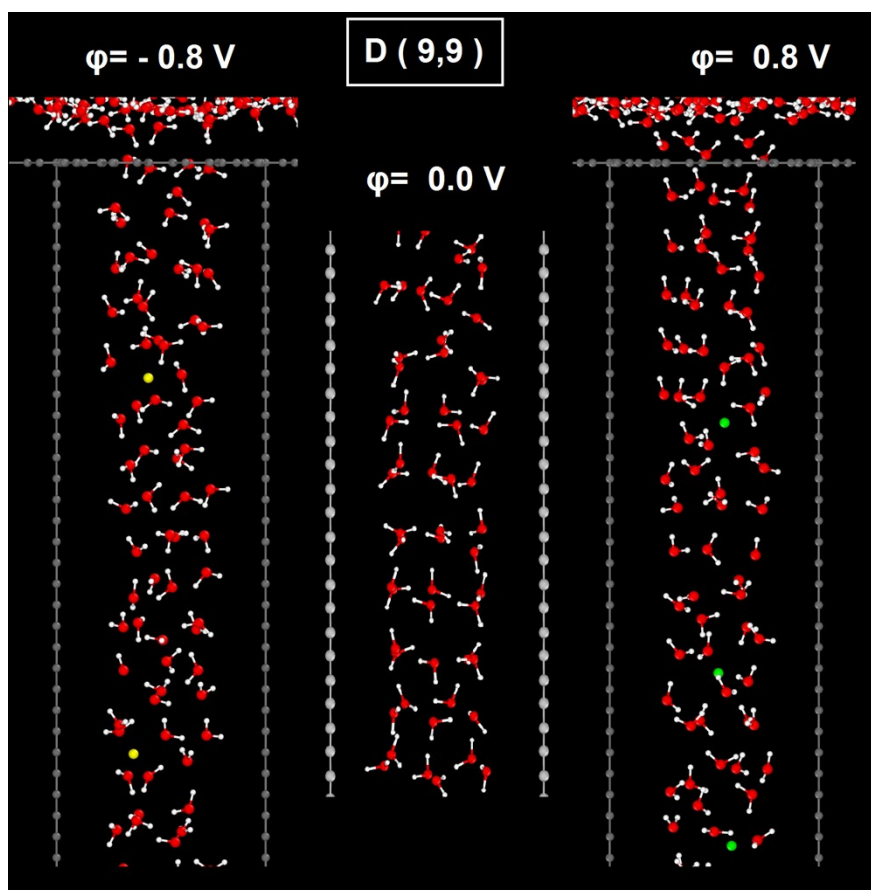

**Fig. S7** The schematic showing the structure of the confined electrolyte inside the charged and uncharged D (9,9) electrodes. The white, red, yellow, green, and grey spheres represent H for water, O for water,  $\text{Na}^+$ ,  $\text{Cl}^-$ , and carbon for the electrode respectively.

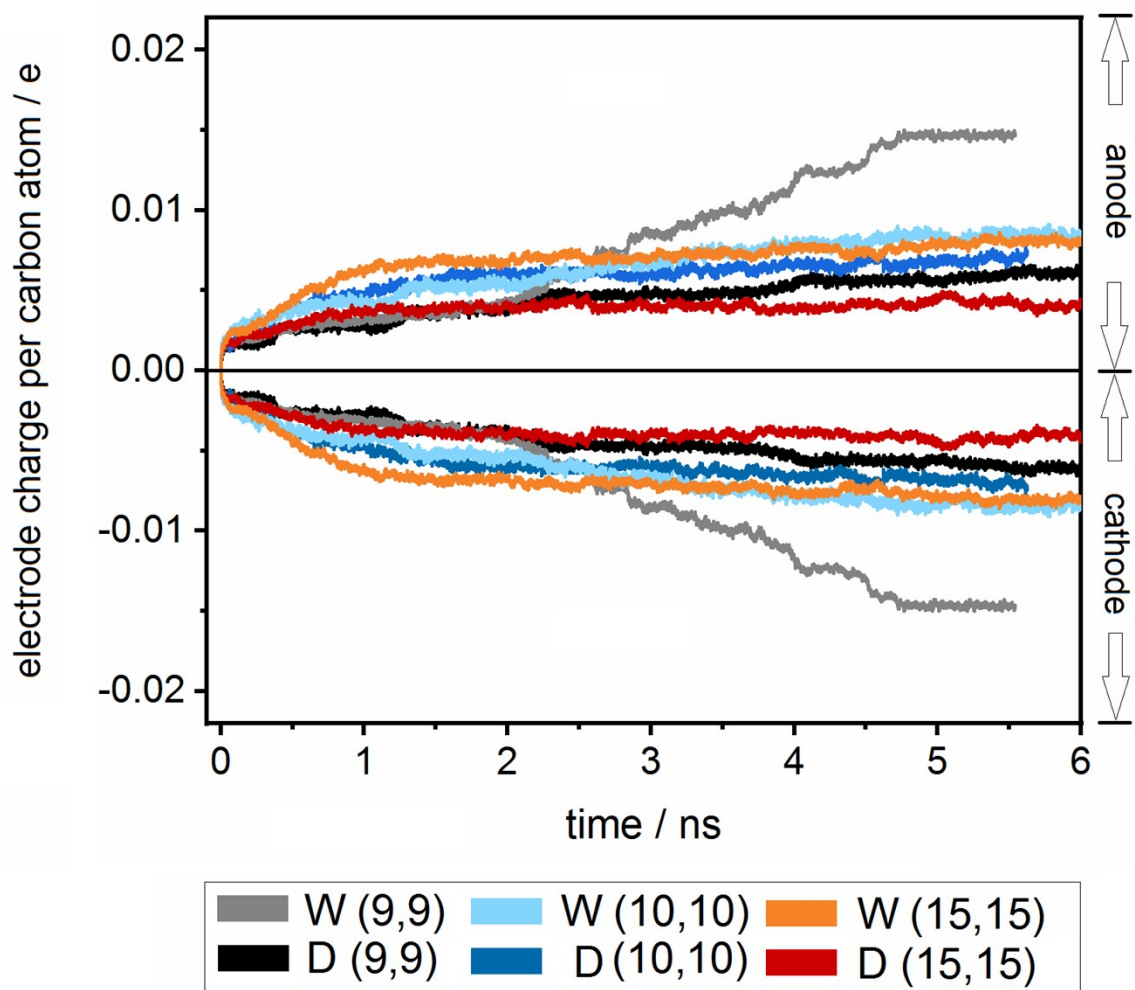

**Fig. S8** Evolution of the CNT electrodes' average electronic charge per atom. The curves with positive (negative) electronic charge belong to the anodes (cathodes).

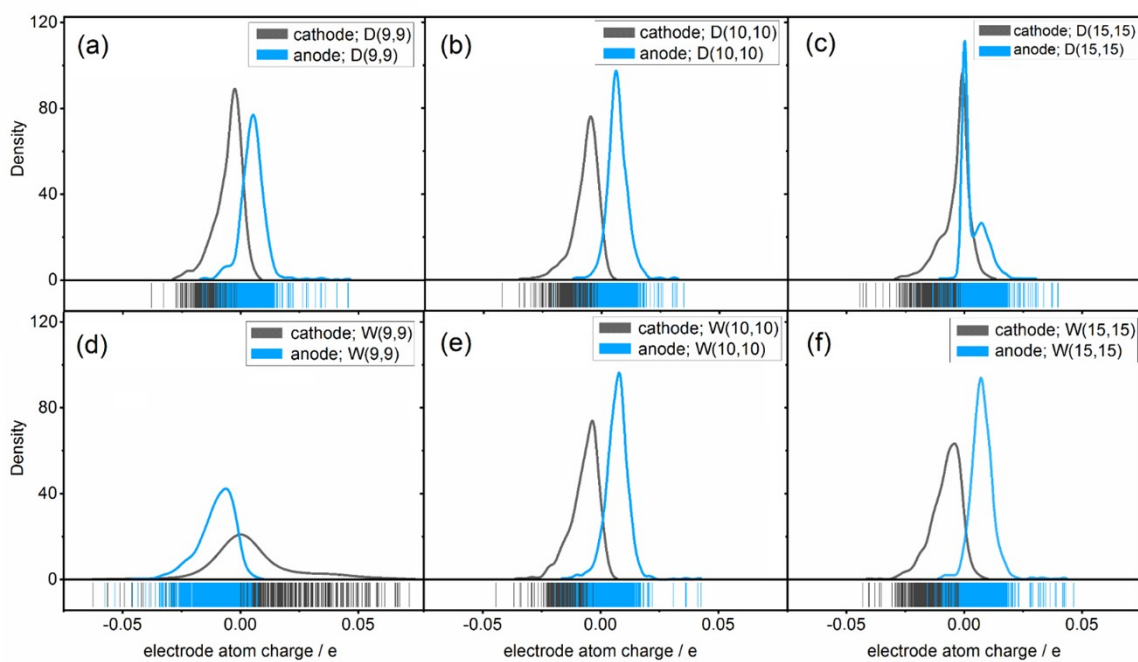

**Fig. S9** The electronic charge distribution of the electrode atoms (a) D (9,9) (b) D (10,10) (c) D (15,15) (d) W (9,9) (e) W (10,10) (f) W (15,15)
